# Supplementary material
Source: PubMed Central journal article supplement (PMC263873)

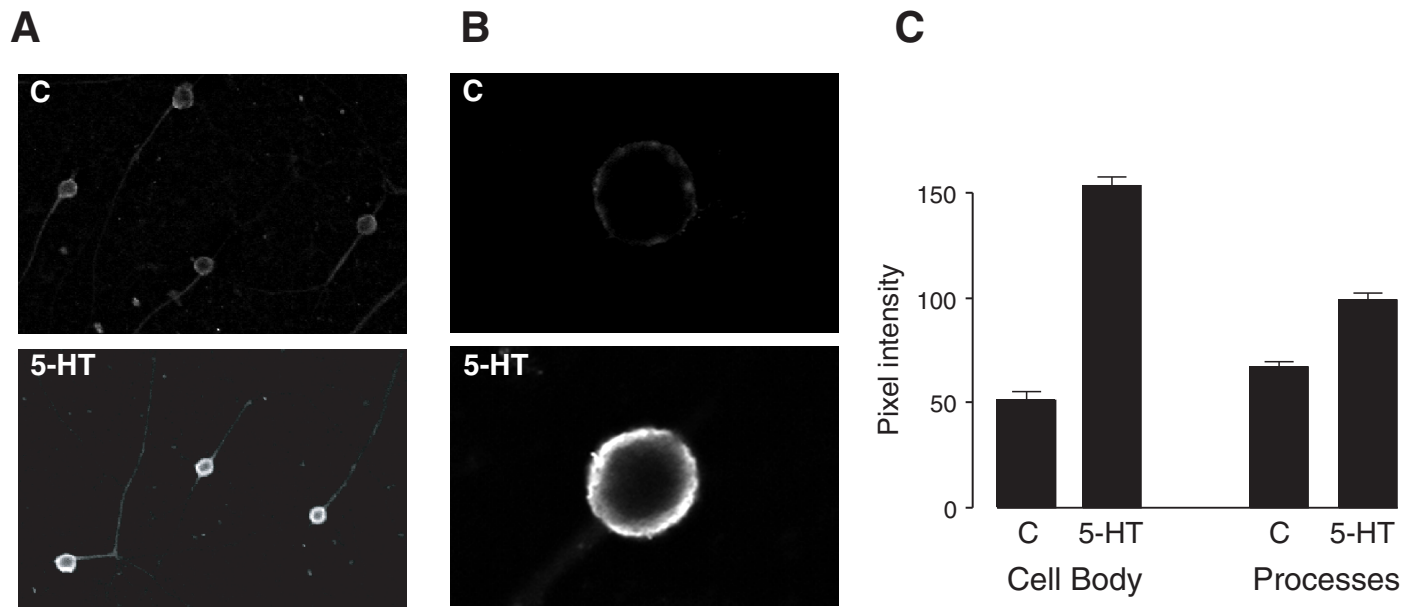

Supplement: pnas_100_23_13680__7.pdf [file pnas_100_23_13680__7.pdf]
